# Supplementary material
Source: Springer Nature journal article supplement (https://www.springermedizin.de/resource/supplementary/12885_2012_4085_MOESM2_ESM.pdf/9465266)
Supplement: MOESM2 [file 9465266]

Additional File 2.

The genotype frequency distribution and results of logistic regression analysis (odds ratio OR and 95% confidence interval CI) of the studied *NBN* gene polymorphism in controls and leukemia patients.

| Gene       | Polymorphism        | Genotype | Leukemia<br><i>n</i> [%] | Controls<br><i>n</i> [%] | OR [95% CI]           | <i>P</i> |
|------------|---------------------|----------|--------------------------|--------------------------|-----------------------|----------|
| <i>NBN</i> | <b>c.102G&gt;A</b>  | GG       | 90 [41]                  | 116 [42]                 | 1 <sup>a</sup>        |          |
|            |                     | GA       | 95 [43]                  | 129 [47]                 | 0.9492 [0.6477-1.391] | 0.7891   |
|            |                     | AA       | 35 [16]                  | 30 [11]                  | 1.504 [0.8588-2.633]  | 0.1521   |
|            | <b>c.553G&gt;C</b>  | GG       | 96 [41]                  | 111 [40]                 | 1 <sup>a</sup>        |          |
|            |                     | GC       | 92 [39]                  | 134 [49]                 | 0.7938 [0.5424-1.162] | 0.2345   |
|            |                     | CC       | 44 [20]                  | 30 [11]                  | 1.696 [0.9896-2.906]  | 0.0534   |
|            | <b>c.1197T&gt;C</b> | TT       | 71 [34]                  | 96 [35]                  | 1 <sup>a</sup>        |          |
|            |                     | TC       | 96 [46]                  | 129 [47]                 | 1.006 [0.6712-1.509]  | 0.9760   |
|            |                     | CC       | 40 [20]                  | 50 [18]                  | 1.082 [0.6451-1.814]  | 0.7658   |
|            | <b>c.2016A&gt;G</b> | AA       | 92 [43]                  | 115 [42]                 | 1 <sup>a</sup>        |          |
|            |                     | AG       | 89 [41]                  | 128 [46]                 | 0.8691 [0.5913-1.278] | 0.4753   |
|            |                     | GG       | 35 [16]                  | 32 [12]                  | 1.367 [0.7869-2.375]  | 0.2661   |
